# Supplementary material for: Immuno-enhancement effects of Korean Red Ginseng in healthy adults: a randomized, double-blind, placebo-controlled trial
Source: PubMed Central journal article supplement — J Ginseng Res. 2020 Sep 16;45(1):191–8. doi: 10.1016/j.jgr.2020.08.003 (PMC7790881; doi:10.1016/j.jgr.2020.08.003), 2020-09-16
Supplement: mmc1.pdf [file mmc1.pdf]

## PUBLICATION CHECKLIST

**Only complete manuscript submissions will be considered for publication. Complete submission must include:**

- A completed Publication Checklist
- Cover letter for manuscript submission
- Authorship statement signed by all authors
- Signed conflict of interest statement
- Signed copyright transfer agreement
- Manuscript in MS Word format

*AND, where applicable*

- Letter of approval from review committee for use of human samples in research and human experiments
- Letter of approval from relevant authority for use of animals in experiments
- Signed consent to publish (in print and online) from human subjects who can be identified in your manuscript
- Letter(s) of permission from copyright holder(s) to use copyrighted sources in your manuscript

**In the actual article, ensure that the following information is provided:**

- Title page
  - Article category
  - Article title
  - Name(s) and affiliation(s) of author(s)
  - Corresponding author details (name, e-mail, mailing address, telephone and fax numbers)
  - Short running title not exceeding 50 characters
- Abstracts and keywords: required for Review Article, Original Article, Case Report, Position Papers and Statements, and Commentaries
  - Abstract (no more than 250 words in length): structured for Original Article; unstructured for the other article categories
  - 3–5 relevant keywords in alphabetical order (MeSH terms are recommended; see <http://www.ncbi.nlm.nih.gov/mesh?term>)
- Main text
- References in the correct format, and all references in the List are cited in the Text/Tables/Figures, and vice versa

*AND, where applicable*

- Funding statement
- Conflict of interest statement
- Acknowledgements
- Table headings and tables (double spaced), each on a new page
- Figure legends (double spaced), on a new page
- Electronic picture files of all figures; resolution of 300 dpi for halftone images, 600 dpi for combination art (halftone + line art), and 1000 dpi for line art

**Further considerations:**

- Manuscript has been spell-checked and grammar-checked
- Colour figures are clearly marked as being intended for: (I) colour reproduction on the Web (free of charge) and in print (authors will be charged HK\$3120/US\$400); or (II) colour reproduction on the Web (free of charge) and in greyscale in print (free of charge). If option (II), then greyscale versions of the figures are also supplied for printing purposes.
